# Supplementary material for: Solubilisation of [60]fullerenes using block copolymers and evaluation of their photodynamic activities
Source: Royal Society of Chemistry journal article supplement (doi:10.1039/b719671g), 2008-01-01
Supplement: b719671g.pdf [file b719671g.pdf]

## Electronic Supplementary Information for

# Solubilisation of [60]fullerenes using block copolymers and evaluation of their photodynamic activities

Motofusa Akiyama,<sup>a</sup> Atsushi Ikeda,<sup>\*a</sup> Takashi Shintani,<sup>a</sup> Yuki Doi,<sup>a</sup> Jun-ichi Kikuchi,<sup>a</sup> Takuya Ogawa,<sup>b</sup> Keiichiro Yogo,<sup>b</sup> Tatsuo Takeya<sup>b</sup> and Naoyuki Yamamoto<sup>c</sup>

<sup>a</sup> Graduate School of Materials Science, Nara Institute of Science and Technology, Ikoma, Nara 630-0192, Japan. Fax: +81 743 72 6099; Tel: +81 743 72 6091; E-mail: aikeda@ms.naist.jp

<sup>b</sup> Graduate School of Biological Science, Nara Institute of Science and Technology, Ikoma, Nara 630-0192, Japan

<sup>c</sup> Wako Pure Chemical Industries, Ltd., 6-1, Takada-cho, Amagasaki, Hyogo 661-0963, Japan

**Table S1.** Absorbance and Solubility of BPMIC<sub>60</sub>

| Polymer  | Abs <sub>340</sub> | [C <sub>60</sub> ] <sup>a</sup> / mM |
|----------|--------------------|--------------------------------------|
| <b>1</b> | 0.71               | 0.35                                 |
| <b>2</b> | 0.76               | 0.38                                 |
| <b>3</b> | 0.86               | 0.43                                 |
| <b>4</b> | 0.73               | 0.37                                 |
| <b>5</b> | 0.37               | 0.18                                 |

<sup>a</sup> Concentrations of C<sub>60</sub> were determined using a molar extinction coefficient for the aggregation state of C<sub>60</sub>·γ-CDx complex of  $\epsilon_{340} = 2.0 \times 10^4 \text{ M}^{-1} \text{ cm}^{-1}$ .

**Table S2.** Solubility and average particle size of BPMIC<sub>60</sub> after storage for four months

| Polymer  | [C <sub>60</sub> ] <sup>a</sup> / mM | Average particle size / nm |
|----------|--------------------------------------|----------------------------|
| <b>1</b> | 0.35                                 | 118                        |
| <b>2</b> | 0.37                                 | 102                        |
| <b>3</b> | 0.41                                 | 76                         |
| <b>4</b> | 0.35                                 | 83                         |
| <b>5</b> | 0.17                                 | 145                        |

<sup>a</sup> Concentrations of C<sub>60</sub> were determined using a molar extinction coefficient for the aggregation state of C<sub>60</sub>·γ-CDx complex of  $\epsilon_{340} = 2.0 \times 10^4 \text{ M}^{-1} \text{ cm}^{-1}$ .

**Table S3.** Percentages of cells stained with PI.

| Polymer  | C <sub>60</sub> | Light | Incubation time after photoirradiation / h | Nonviable cell % |
|----------|-----------------|-------|--------------------------------------------|------------------|
| <b>1</b> | ○               | —     | —                                          | 0.3 ± 0.6        |
|          | ○               | ○     | 0                                          | 14.6 ± 7.0       |
|          | ○               | ○     | 24                                         | 65.7 ± 4.3       |
|          | —               | —     | —                                          | 0.0 ± 0.0        |
|          | —               | ○     | 0                                          | 0.0 ± 0.0        |
|          | —               | ○     | 24                                         | 1.0 ± 0.7        |
| <b>2</b> | ○               | —     | —                                          | 0.9 ± 1.7        |
|          | ○               | ○     | 0                                          | 59.1 ± 5.7       |
|          | ○               | ○     | 24                                         | 87.0 ± 8.6       |
|          | —               | —     | —                                          | 0.1 ± 0.1        |
|          | —               | ○     | 0                                          | 0.0 ± 0.0        |
|          | —               | ○     | 24                                         | 0.7 ± 0.2        |
| <b>3</b> | ○               | —     | —                                          | 0.3 ± 0.3        |
|          | ○               | ○     | 0                                          | 82.4 ± 10.4      |
|          | ○               | ○     | 24                                         | 98.7 ± 1.6       |
|          | —               | —     | —                                          | 0.1 ± 0.2        |
|          | —               | ○     | 0                                          | 0.1 ± 0.1        |
|          | —               | ○     | 24                                         | 1.3 ± 1.3        |
| <b>4</b> | ○               | —     | —                                          | 0.5 ± 1.3        |
|          | ○               | ○     | 0                                          | 0.4 ± 0.8        |
|          | ○               | ○     | 24                                         | 0.7 ± 0.8        |
|          | —               | —     | —                                          | 0.0 ± 0.0        |
|          | —               | ○     | 0                                          | 0.3 ± 0.3        |
|          | —               | ○     | 24                                         | 0.7 ± 0.4        |
| <b>5</b> | ○               | —     | —                                          | 0.3 ± 0.7        |
|          | ○               | ○     | 0                                          | 0.1 ± 0.1        |
|          | ○               | ○     | 24                                         | 0.9 ± 0.8        |
|          | —               | —     | —                                          | 0.1 ± 0.1        |
|          | —               | ○     | 0                                          | 0.0 ± 0.0        |
|          | —               | ○     | 24                                         | 0.6 ± 0.7        |

**Table S4.** Molecular weight and polydispersity data for BP

| BP | $M_n/\text{g mol}^{-1}$ | $M_w/M_n$ (GPC) |
|----|-------------------------|-----------------|
| 1  | 4,526                   | 1.50            |
| 2  | 4,786                   | 1.52            |
| 3  | 5,057                   | 1.65            |
| 4  | 7,997                   | 1.29            |
| 5  | 42,747                  | 1.11            |

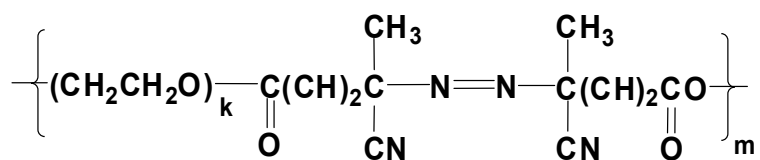

**Scheme S1.** Scheme of VPE-0201

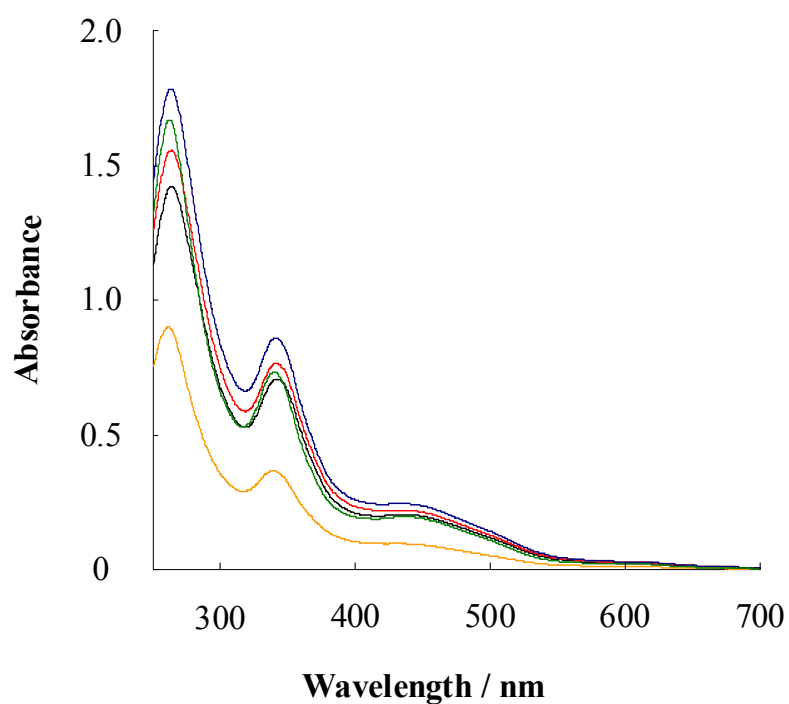

**Fig. S1.** UV-Vis absorption spectra of the BPMIC<sub>60</sub> fullerenes of (a) **1** (black line), (b) **2** (red line), (c) **3** (blue line), (d) **4** (orange line) and (e) **5** (green line). All spectra were measured at 25°C (1mm-cell).

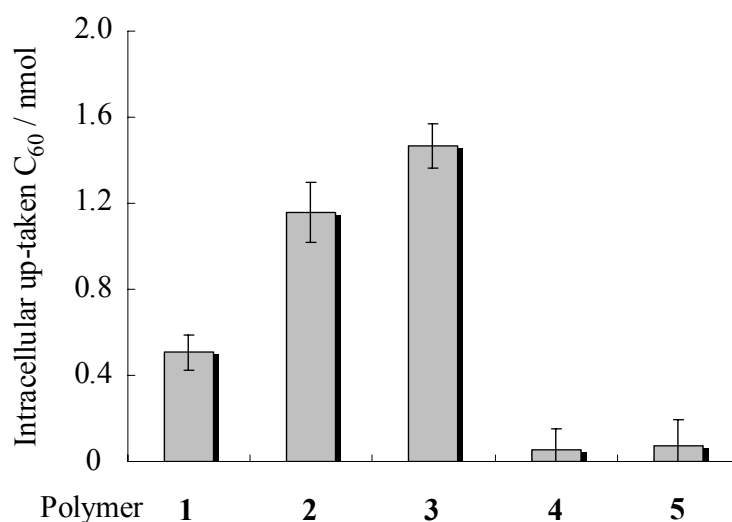

**Fig. S2.** Intracellular uptake of BPMIC<sub>60</sub>. HeLa cells were incubated with [C<sub>60</sub>] = 2.5 μM of BPMIC<sub>60</sub> for 24 h. After incubation, the culture medium was collected and the reduction of BPMIC<sub>60</sub> in culture medium was determined by monitoring the absorbance at 340 nm (10 mm-cells). The amount of intracellular up-taken C<sub>60</sub> was counted using  $\epsilon_{340} = 2.0 \times 10^4 \text{ M}^{-1} \text{ cm}^{-1}$ . Each value presented is the mean ( $\pm$ SD) of three experiments.
